# Supplementary material for: The Prognostic Value of Pain Phenotyping in Relation to Treatment Outcomes in Patients with Axial Spondyloarthritis Treated in Clinical Practice: A Prospective Cohort Study
Source: MDPI journal article supplement (doi:10.3390/jcm10071469), 2021-04-02
Supplement: s1 [file s1]

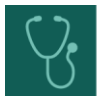

## Supplementary Material

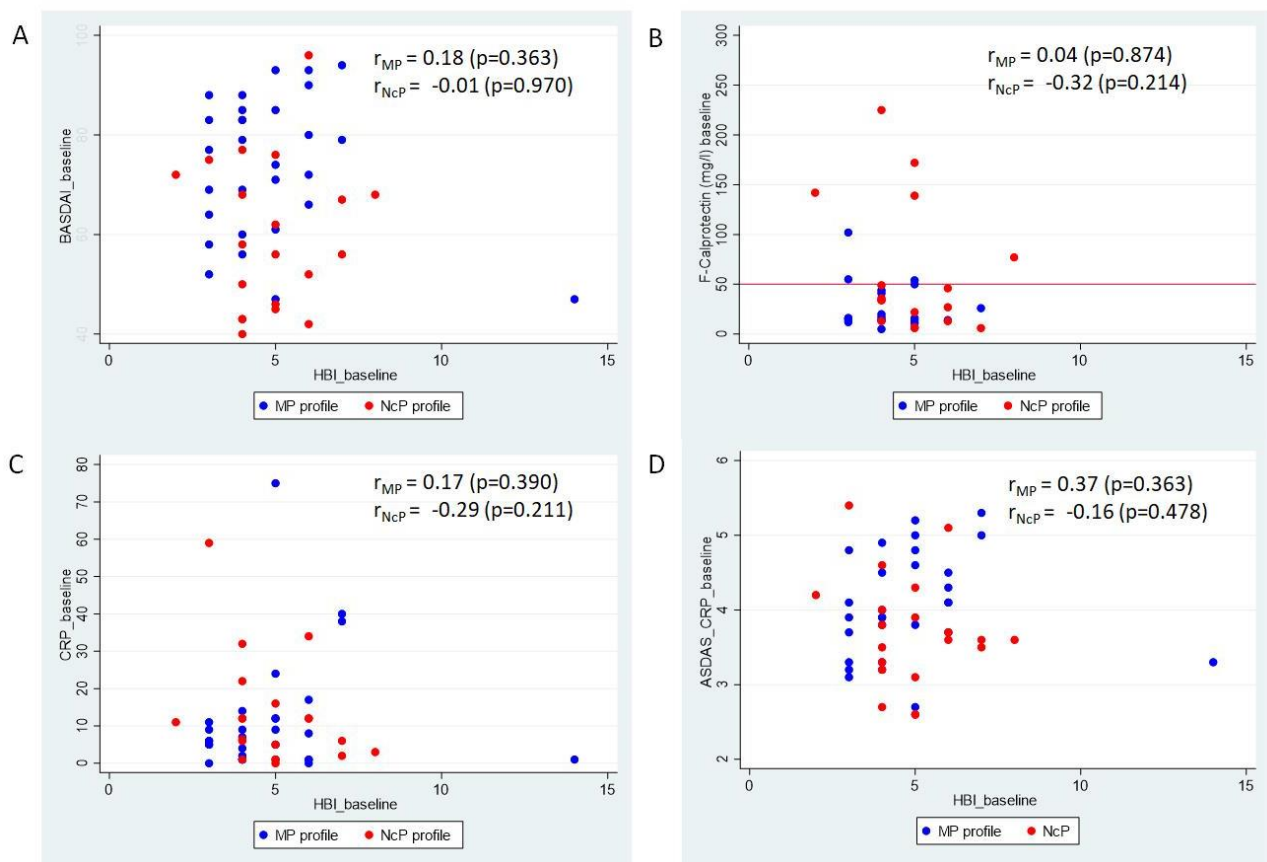

**Figure S1.** Scatter diagrams of spearman correlation between Harvey Bradshaw Index (HBI) and variables reflecting disease activity.

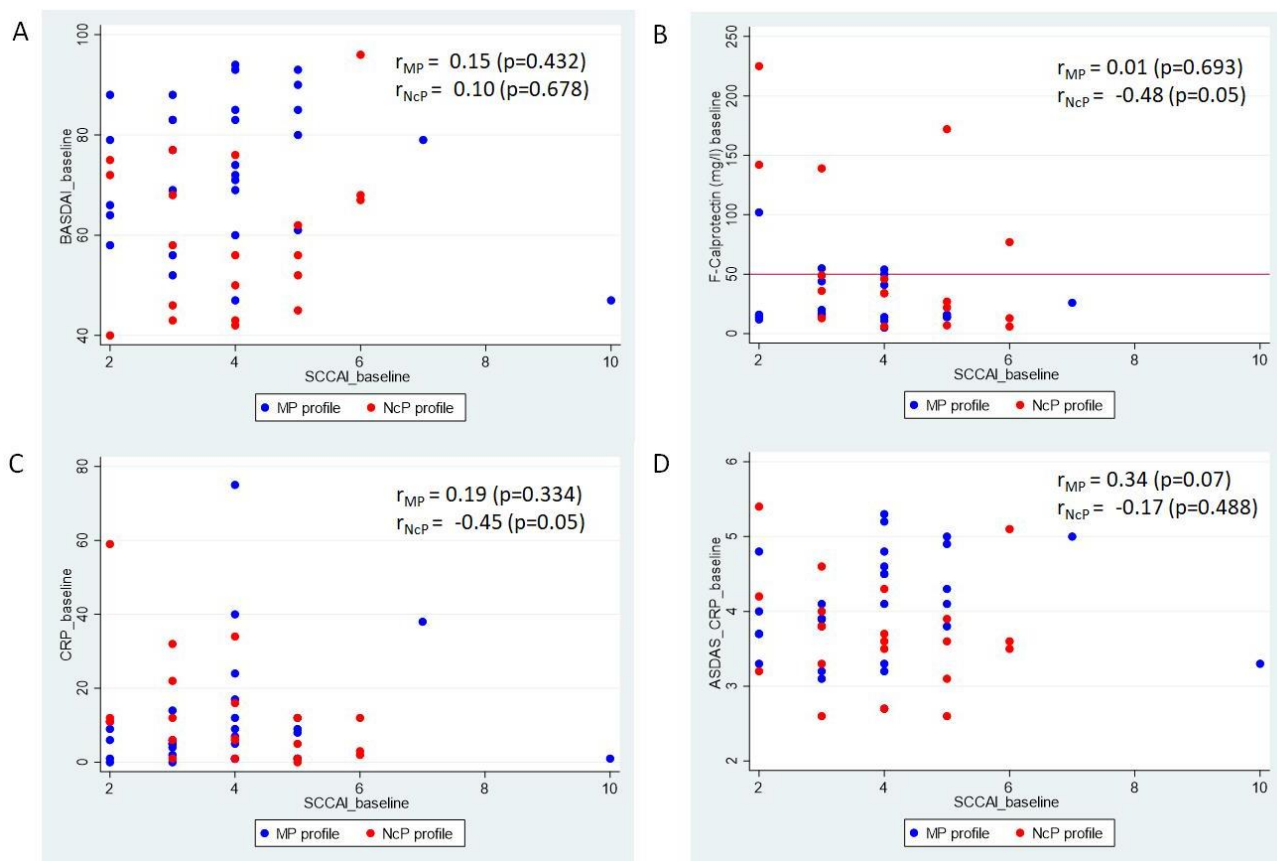

**Figure S2.** Scatter diagrams of spearman correlation between Simple Clinical Colitis Activity Index (SCCAI) and variables reflecting disease activity.
